# Supplementary material for: In Vivo Toxicity of Silver Nanoparticles and Silver Ions in Zebrafish (Danio rerio)
Source: PubMed Central journal article supplement (PMC3235887; doi:10.1155/2012/293784), 2011-12-01
Supplement: 293784.f1.pdf [file 293784.f1.pdf]

Table 1A, pH value 3.9

| <b>Sample</b> | <b>Size<sup>a</sup> (SE) [nm]</b> | <b>PDI<sup>b</sup> (SE)</b> |
|---------------|-----------------------------------|-----------------------------|
| 100 mg 5min   | 101 (2)                           | 0.286 (0.002)               |
| 200 mg 5min   | 103 (1)                           | 0.286 (0.009)               |
| 400 mg 5min   | 114 (2)                           | 0.294 (0.002)               |
| 600 mg 5min   | 108 (1)                           | 0.39 (0.01)                 |
| 800 mg 5min   | 108 (1)                           | 0.32 (0.05)                 |
|               |                                   |                             |
| 100 mg 1-2h   | 136 (5)                           | 0.449 (0.008)               |
| 200 mg 1-2h   | 137 (2)                           | 0.41 (0.02)                 |
| 400 mg 1-2h   | 151 (1)                           | 0.303 (0.002)               |
| 600 mg 1-2h   | 182 (1)                           | 0.306 (0.005)               |
| 800 mg 1-2h   | 204 (4)                           | 0.286 (0.008)               |
|               |                                   |                             |
| 100 mg 24h    | 143 (1)                           | 0.482 (0.006)               |
| 200 mg 24h    | 158 (9)                           | 0.45 (0.04)                 |
| 400 mg 24h    | 210 (4)                           | 0.39 (0.06)                 |
| 600 mg 24h    | 269 (3)                           | 0.386 (0.008)               |
| 800 mg 24h    | 311 (9)                           | 0.30 (0.01)                 |

<sup>a)</sup> Peak position of the major peak in the DLS distribution (Standard Error)

<sup>b)</sup> Polydispersity index calculated by the Malvern Dispersion Software (Standard Error)

Table 1B, pH value 6.9

| <b>Sample</b> | <b>Size<sup>a</sup> (SE) [nm]</b> | <b>PDI<sup>b</sup> (SE)</b> |
|---------------|-----------------------------------|-----------------------------|
| 100 mg 5min   | 111 (6)                           | 0.38 (0.06)                 |
| 200 mg 5min   | 106 (3)                           | 0.42 (0.02)                 |
| 400 mg 5min   | 111 (3)                           | 0.42 (0.01)                 |
| 600 mg 5min   | 116 (9)                           | 0.43 (0.03)                 |
| 800 mg 5min   | 138 (14)                          | 0.46 (0.03)                 |
|               |                                   |                             |
| 100 mg 1-2h   | 137 (4)                           | 0.498 (0.004)               |
| 200 mg 1-2h   | 148 (8)                           | 0.507 (0.004)               |
| 400 mg 1-2h   | 170 (3)                           | 0.55(0.008)                 |
| 600 mg 1-2h   | 165 (1)                           | 0.53(0.01)                  |
| 800 mg 1-2h   | 193 (4)                           | 0.58 (0.01)                 |
|               |                                   |                             |
| 100 mg 24h    | 170 (15)                          | 0.6 (0.2)                   |
| 200 mg 24h    | 205 (21)                          | 0.54 (0.04)                 |
| 400 mg 24h    | 202 (16)                          | 0.58 (0.05)                 |
| 600 mg 24h    | 260 (29)                          | 0.554 (0.008)               |
| 800 mg 24h    | 196 (7)                           | 0.62 (0.09)                 |

<sup>a)</sup> Peak position of the major peak in the DLS distribution

<sup>b)</sup> Polydispersity index calculated by the Malvern Dispersion Software
